# Supplementary material for: Chitosan oligosaccharide induces resistance to Tobacco mosaic virus in Arabidopsis via the salicylic acid-mediated signalling pathway
Source: PubMed Central journal article supplement (PMC4870575; doi:10.1038/srep26144), 2016-05-18
Supplement: srep26144-s1.pdf [file srep26144-s1.pdf]

## Supplementary Information

### **Chitosan oligosaccharide induces resistance to *Tobacco***

### ***mosaic virus in Arabidopsis via salicylic acid-mediated signal pathway***

Xiaochen Jia<sup>a, b, +</sup>, Qingshan Meng<sup>a, c, +</sup>, Haihong Zeng<sup>a, d</sup>, Wenxia Wang<sup>a</sup>, Heng Yin<sup>a, \*</sup>

<sup>a</sup> Liaoning Provincial Key Laboratory of Carbohydrates, Dalian Institute of Chemical Physics, Chinese Academy of Sciences, Dalian 116023, China

<sup>b</sup> University of Chinese Academy of Sciences, Beijing, 100049, China

<sup>c</sup> College of Life Science, Dalian University of Technology, Dalian 116023, China

<sup>d</sup> College of Food Science and Engineering, Dalian Ocean University, Dalian 116023, China

<sup>+</sup> These authors contributed equally to this work

\*Corresponding author at: Liaoning Provincial Key Laboratory of Carbohydrates, Dalian Institute of Chemical Physics, Chinese Academy of Sciences, Dalian 116023, China.

E-mail address: [yinheng@dicp.ac.cn](mailto:yinheng@dicp.ac.cn) (H. Yin).

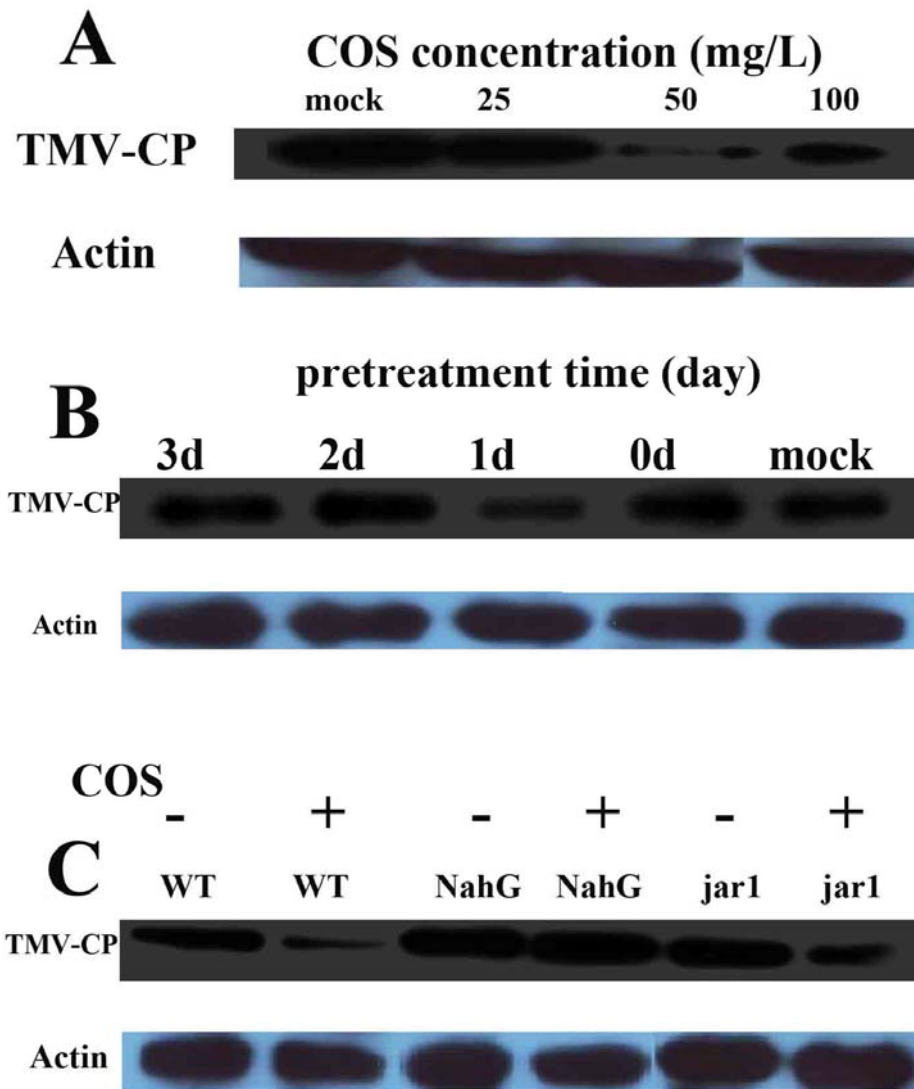

**Figure S1.** The full-length western-blot in Fig.1 and Fig.3. A for Fig.1A; B for Fig.1B; C for Fig.3A, These were the representative experiment and were independently repeated three times using different samples from independent treatment. The same amount of protein was loaded on SDS-PAGE gels, detected by anti-plant actin antibody, which served as the protein loading control. The detection of TMV-CP and loading control were carried out under the same experimental conditions.
